# Supplementary material for: Antibacterial Performance of Terpenoids from the Australian Plant Eremophila lucida
Source: PubMed Central journal article supplement (PMC6627632; doi:10.3390/antibiotics8020063), 2019-05-17

## Supporting Information

### Antibacterial performance of terpenoids from the Australian plant *Eremophila lucida*

Israt J. Biva <sup>a,b</sup>, Chi P. Ndi <sup>c</sup>, Susan J. Semple <sup>c</sup>, Hans J. Griesser <sup>a,b,\*</sup>,

<sup>a</sup> Future Industries Institute, University of South Australia, Mawson Lakes, SA 5095, Australia

<sup>b</sup> Wound Management Innovation Cooperative Research Centre, Toowong, QLD 4066, Australia

<sup>c</sup> Quality Use of Medicines and Pharmacy Research Centre, School of Pharmacy and Medical Sciences, University of South Australia, Frome Road, Adelaide, SA 5000, Australia

\*To whom correspondence should be addressed: Prof. Hans Griesser +61-8-83023703  
[hans.griesser@unisa.edu.au](mailto:hans.griesser@unisa.edu.au)

#### List of Supporting Information

**Figure S1.** *Eremophila lucida*, flowering twigs and growth habit underneath Eucalyptus trees.

**Figure S2.** <sup>1</sup>H NMR spectrum of compound **1** in CDCl<sub>3</sub>

**Figure S3.** <sup>13</sup>C NMR spectrum of compound **1** in CDCl<sub>3</sub>

**Figure S4.** DEPT NMR spectrum of compound **1** in CDCl<sub>3</sub>

**Figure S5.** <sup>1</sup>H-<sup>1</sup>H COSY NMR spectrum of compound **1** in CDCl<sub>3</sub>

**Figure S6.** HSQC NMR spectrum of compound **1** in CDCl<sub>3</sub>

**Figure S7.** HMBC NMR spectrum of compound **1** in CDCl<sub>3</sub>

**Figure S8.** <sup>1</sup>H NMR spectrum of compound **2** in CD<sub>3</sub>OD

**Figure S9.** <sup>13</sup>C NMR spectrum of compound **2** in CD<sub>3</sub>OD

**Figure S10.** <sup>1</sup>H-<sup>1</sup>H COSY NMR spectrum of compound **2** in CD<sub>3</sub>OD

**Figure S11.** HSQC NMR spectrum of compound **2** in CD<sub>3</sub>OD

**Figure S12.** HMBC NMR spectrum of compound **2** in CD<sub>3</sub>OD

**Figure S13.** <sup>1</sup>H NMR spectrum of compound **3** in CDCl<sub>3</sub>

**Figure S14.** <sup>13</sup>C NMR spectrum of compound **3** in CDCl<sub>3</sub>

**Figure S15.** <sup>1</sup>H-<sup>1</sup>H COSY NMR spectrum of compound **3** in CDCl<sub>3</sub>

**Figure S16.** HSQC NMR spectrum of compound **3** in CDCl<sub>3</sub>

**Figure S17.** HMBC NMR spectrum of compound **3** in CDCl<sub>3</sub>

**Figure S1.** *Eremophila lucida*, flowering twigs and growth habit underneath Eucalyptus trees. From <https://florabase.dpaw.wa.gov.au/browse/profile/17549> (viewed 31/3/2019).

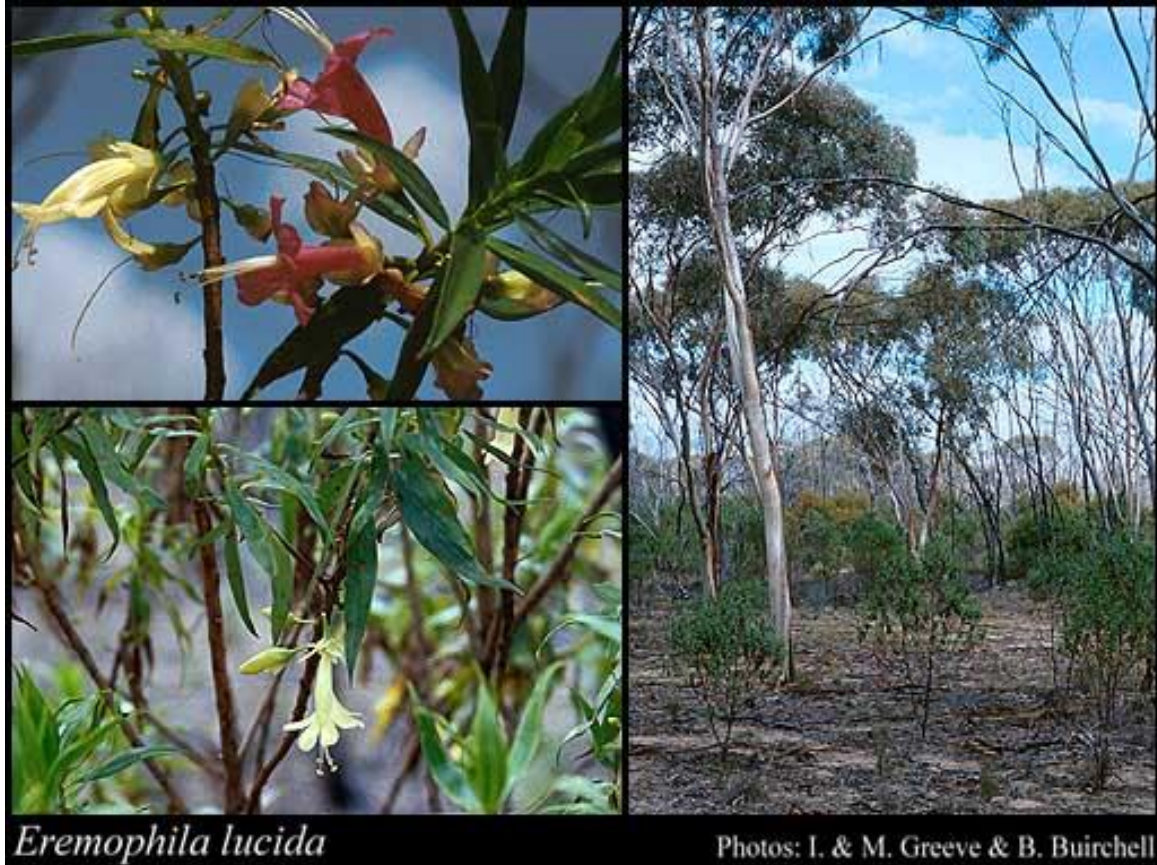

**Figure S2.**  $^1\text{H}$  NMR spectrum of compound 1 in  $\text{CDCl}_3$  (600 MHz)

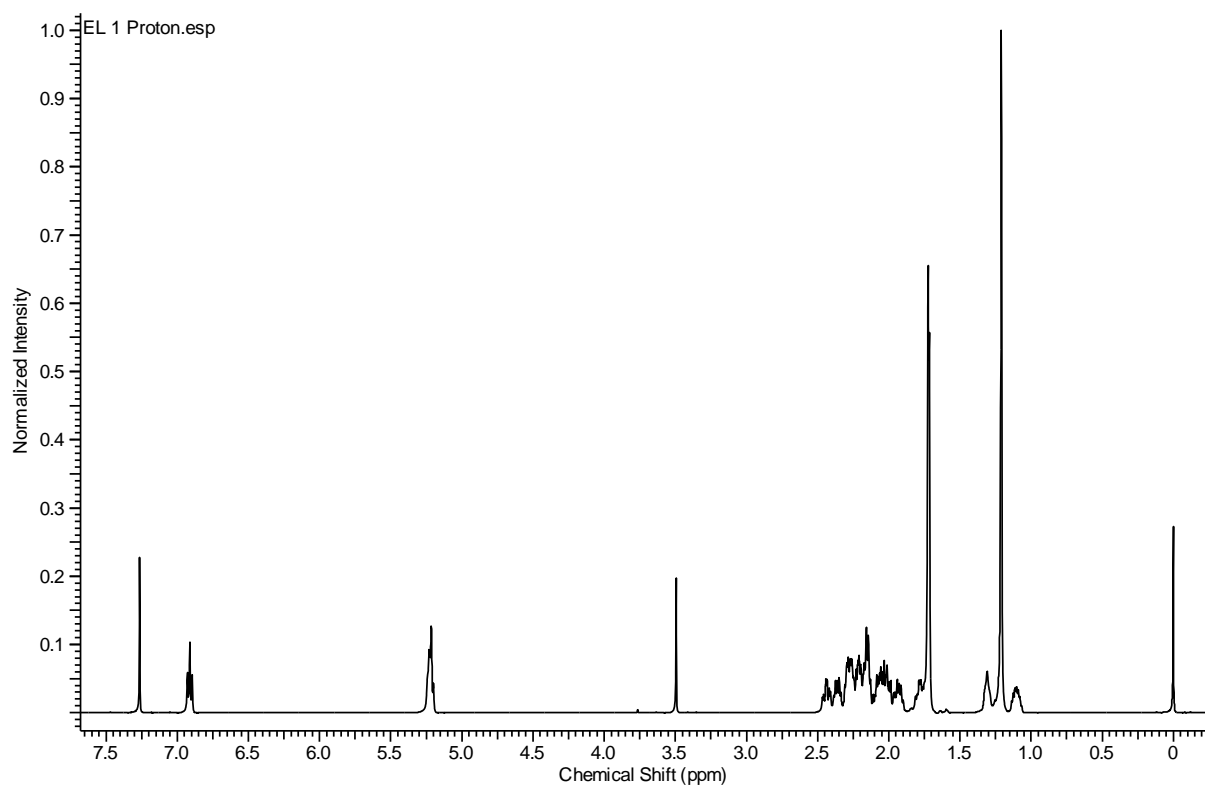

**Figure S3.**  $^{13}\text{C}$  NMR spectrum of compound **1** in  $\text{CDCl}_3$

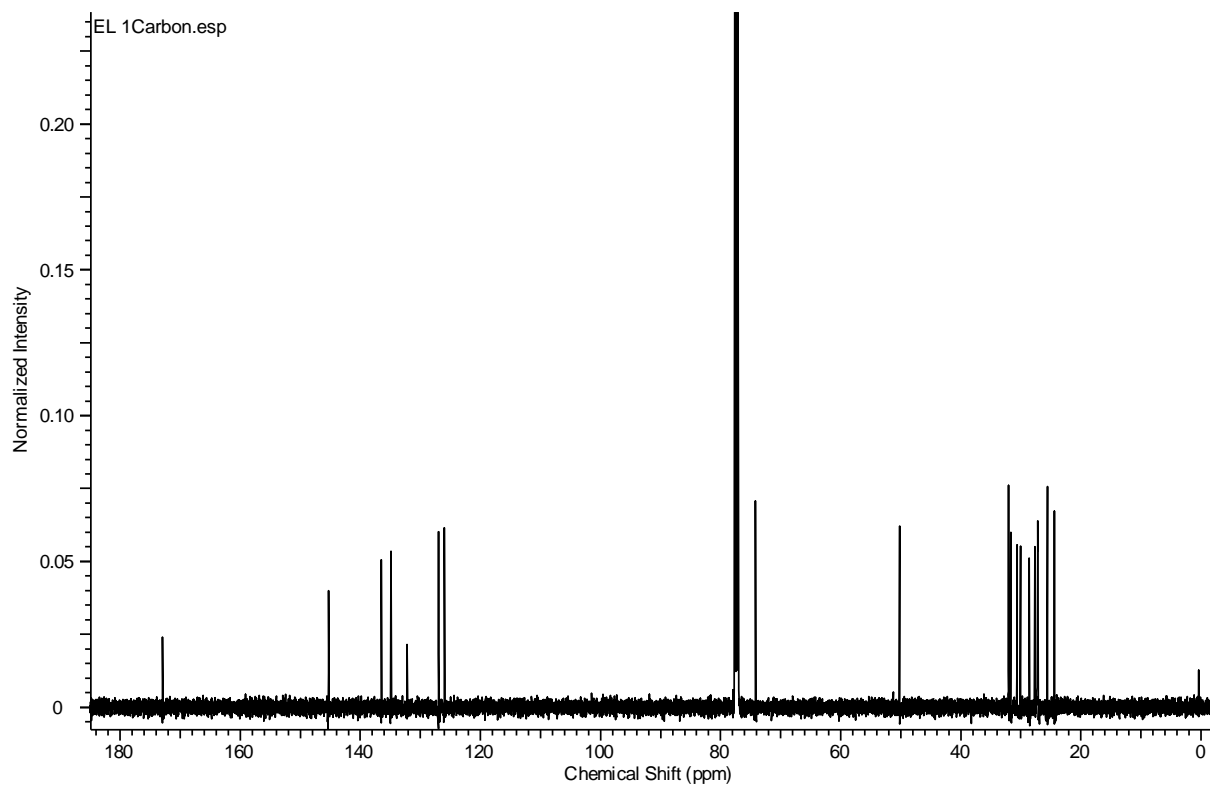

**Figure S4.** DEPT NMR spectrum of compound **1** in CDCl<sub>3</sub>

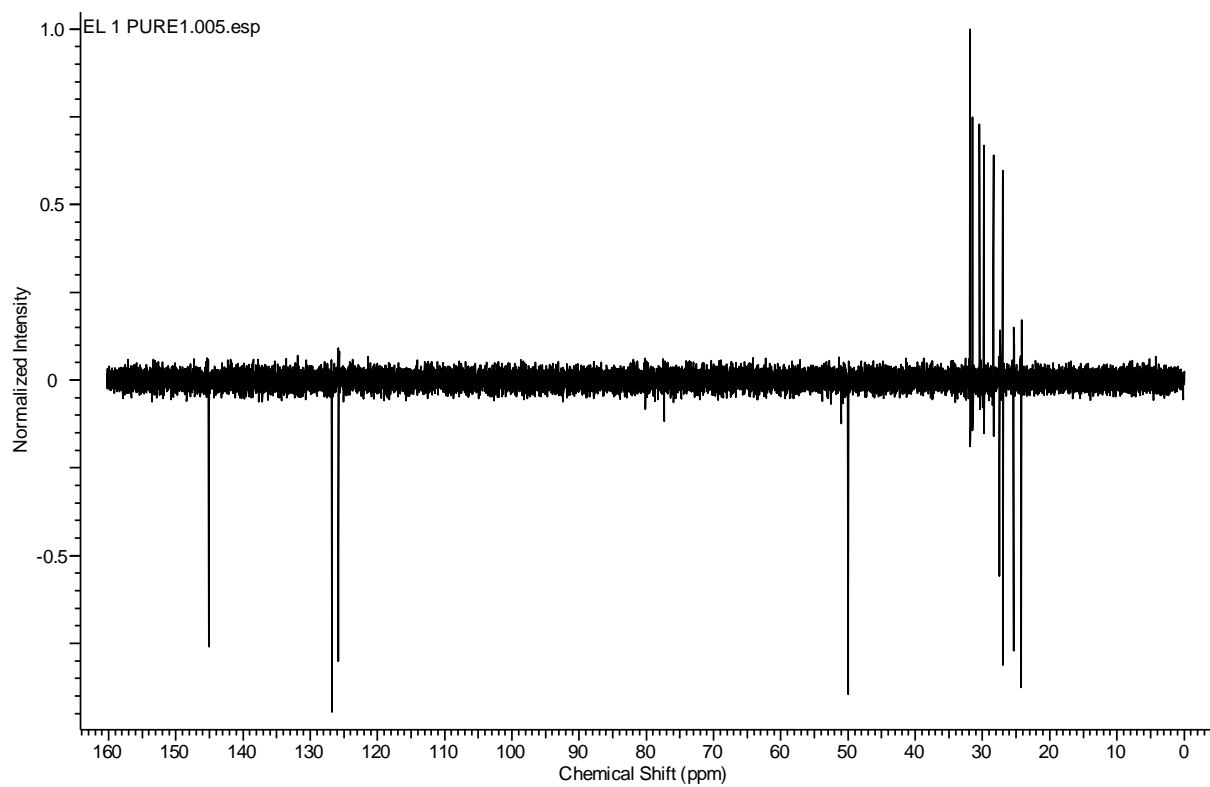

**Figure S5.**  $^1\text{H}$ - $^1\text{H}$  COSY NMR spectrum of compound **1** in  $\text{CDCl}_3$

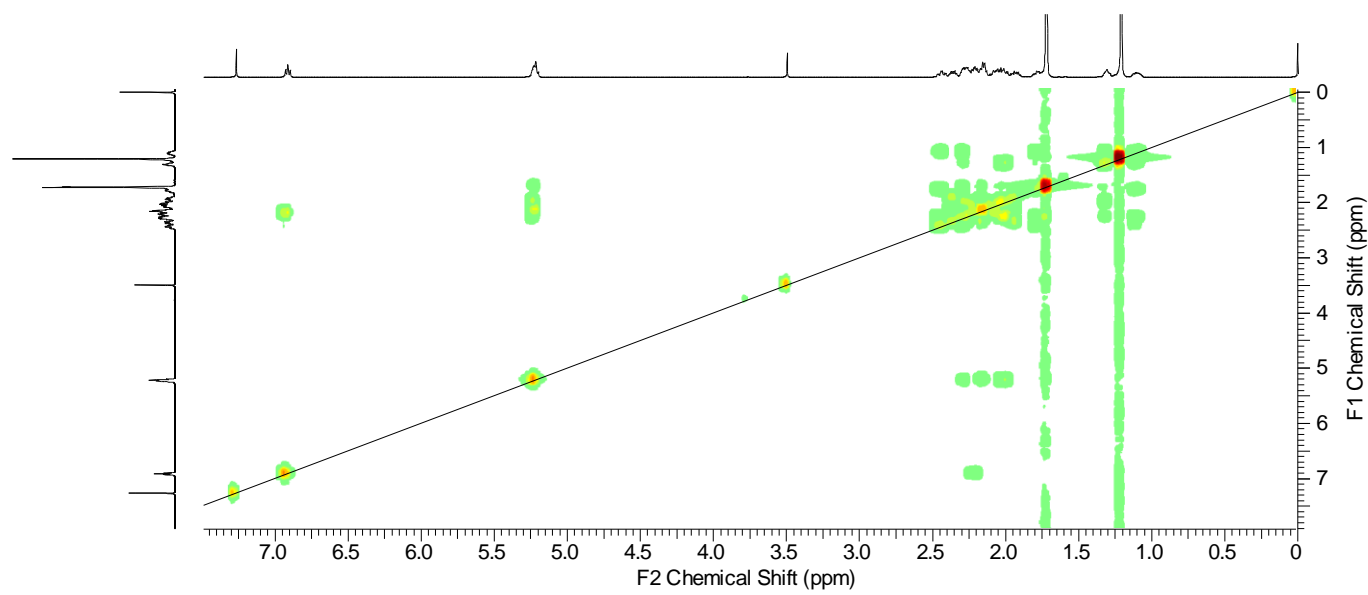

**Figure S6.** HSQC NMR spectrum of compound **1** in CDCl<sub>3</sub>

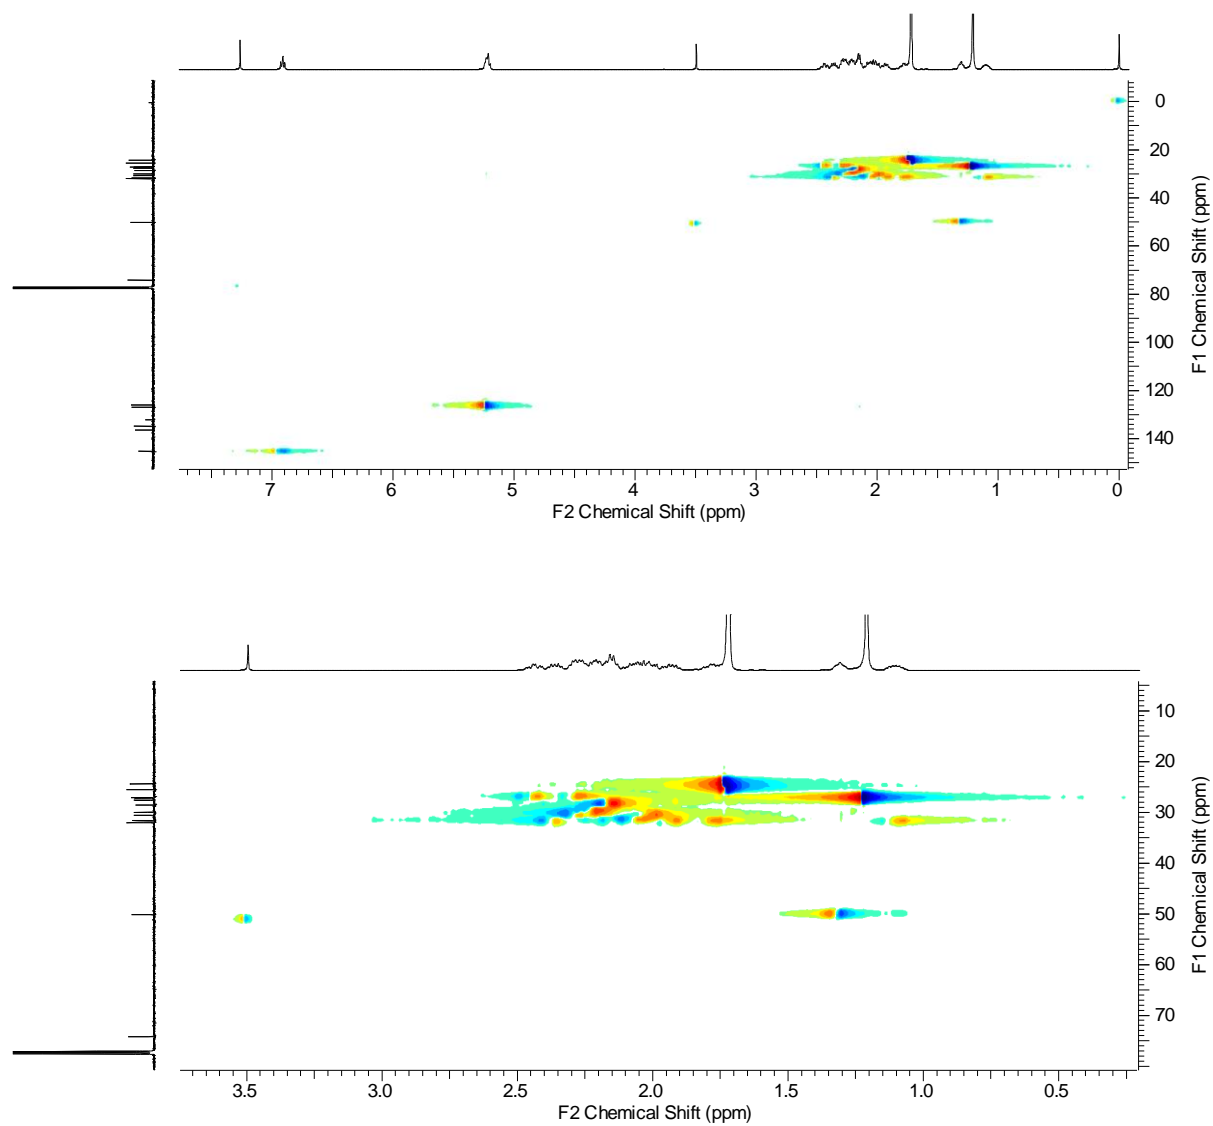

**Figure S7.** HMBC NMR spectrum of compound **1** in CDCl<sub>3</sub>

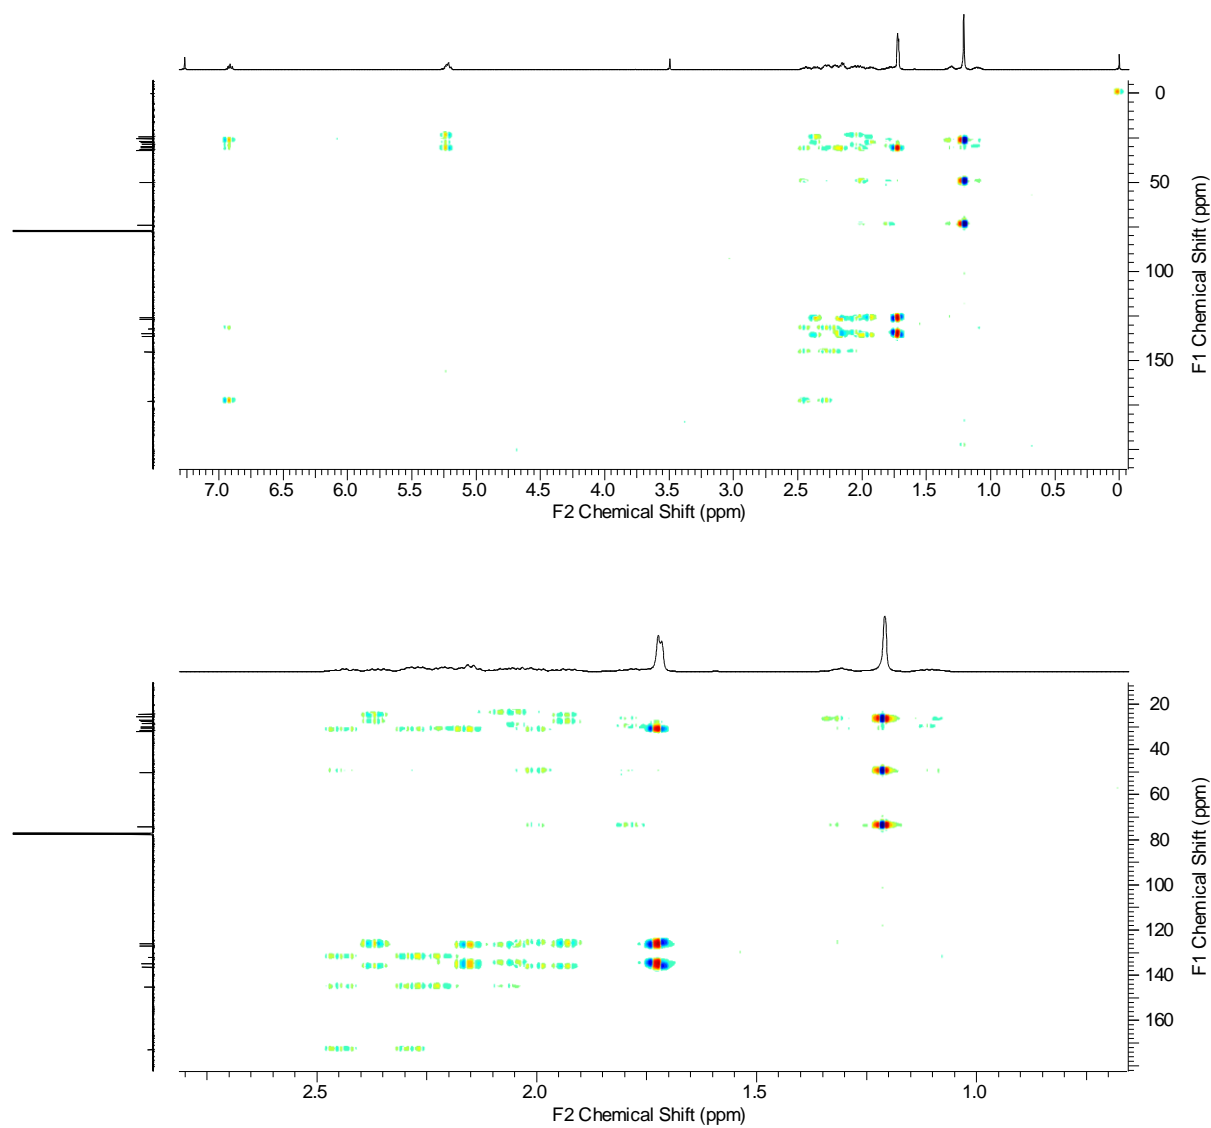



**Figure S8.**  $^1\text{H}$  NMR spectrum of compound **2** in  $\text{CD}_3\text{OD}$  (600 MHz)

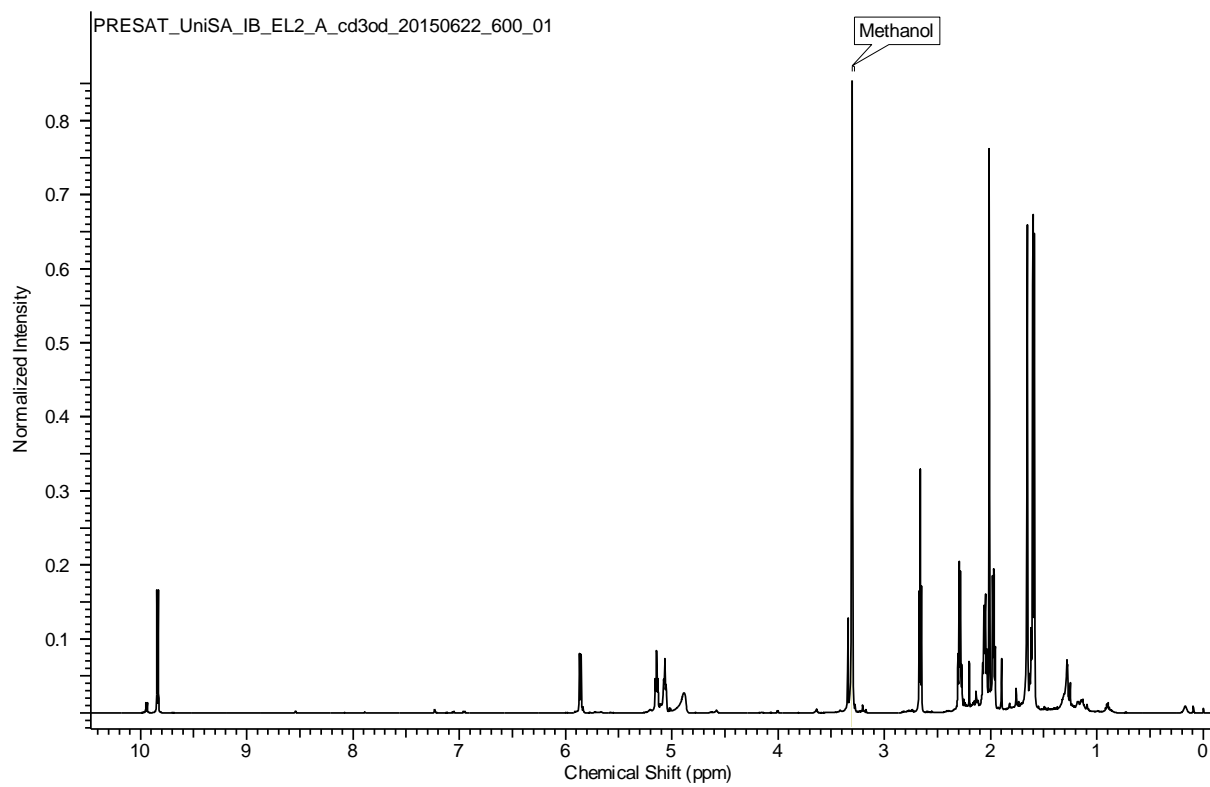

**Figure S9.**  $^{13}\text{C}$  NMR spectrum of compound **2** in  $\text{CD}_3\text{OD}$

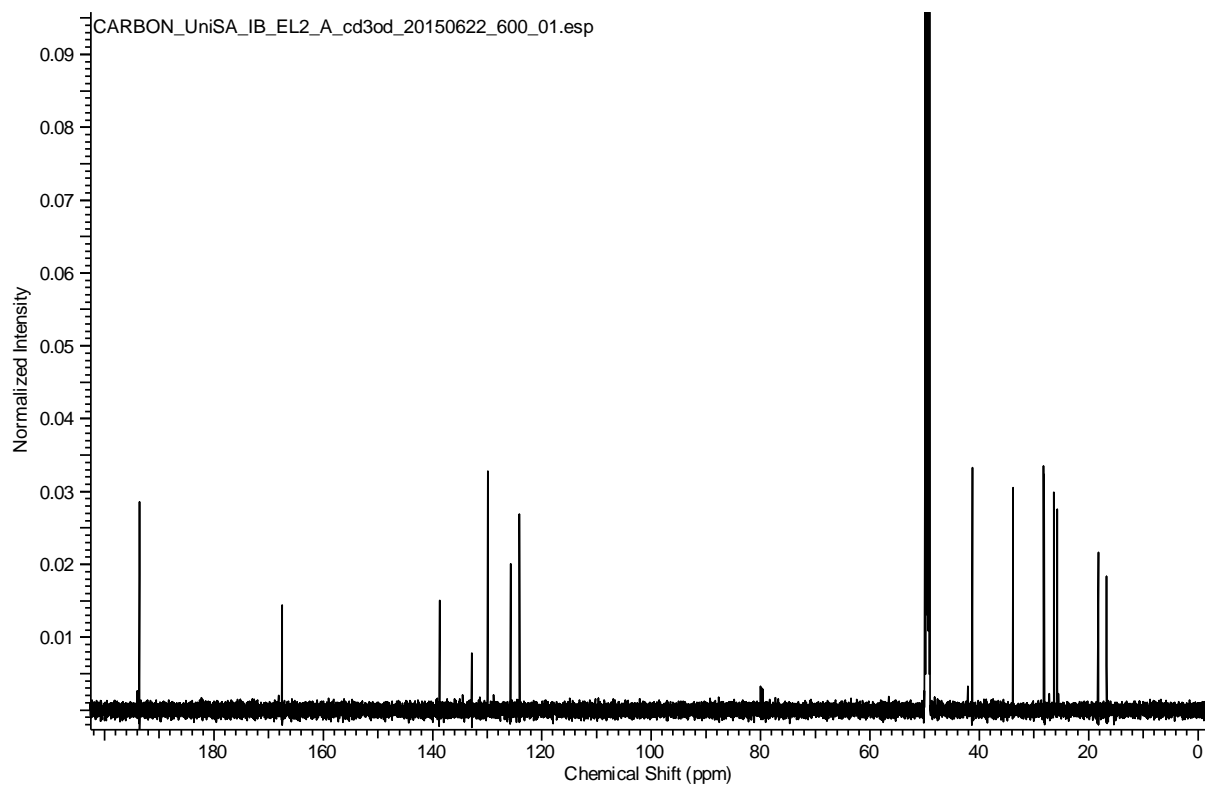

**Figure S10.**  $^1\text{H}$ - $^1\text{H}$  COSY NMR spectrum of compound **2** in  $\text{CD}_3\text{OD}$

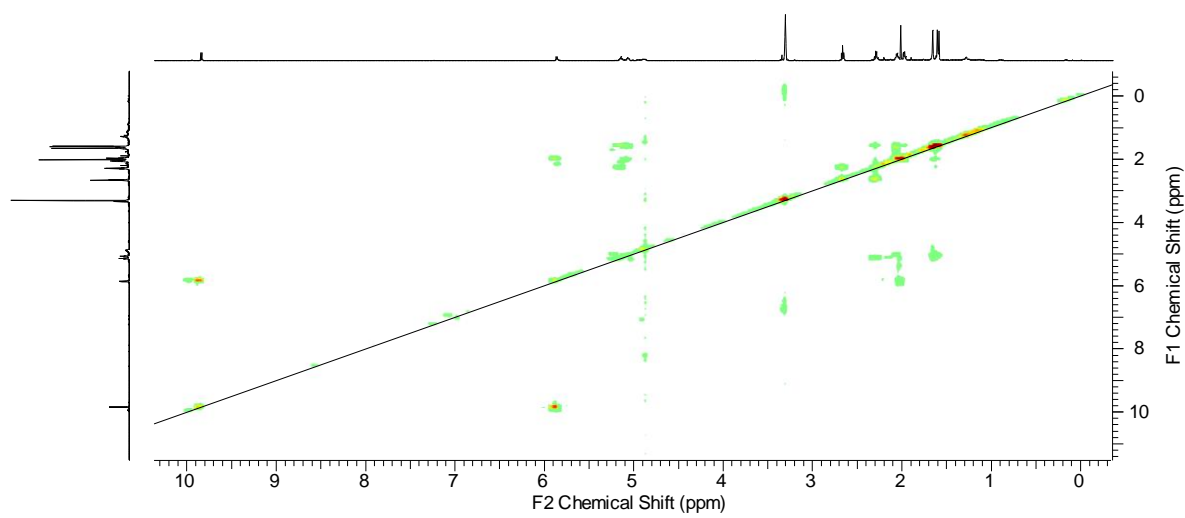

**Figure S11.** HSQC NMR spectrum of compound **2** in CD<sub>3</sub>OD

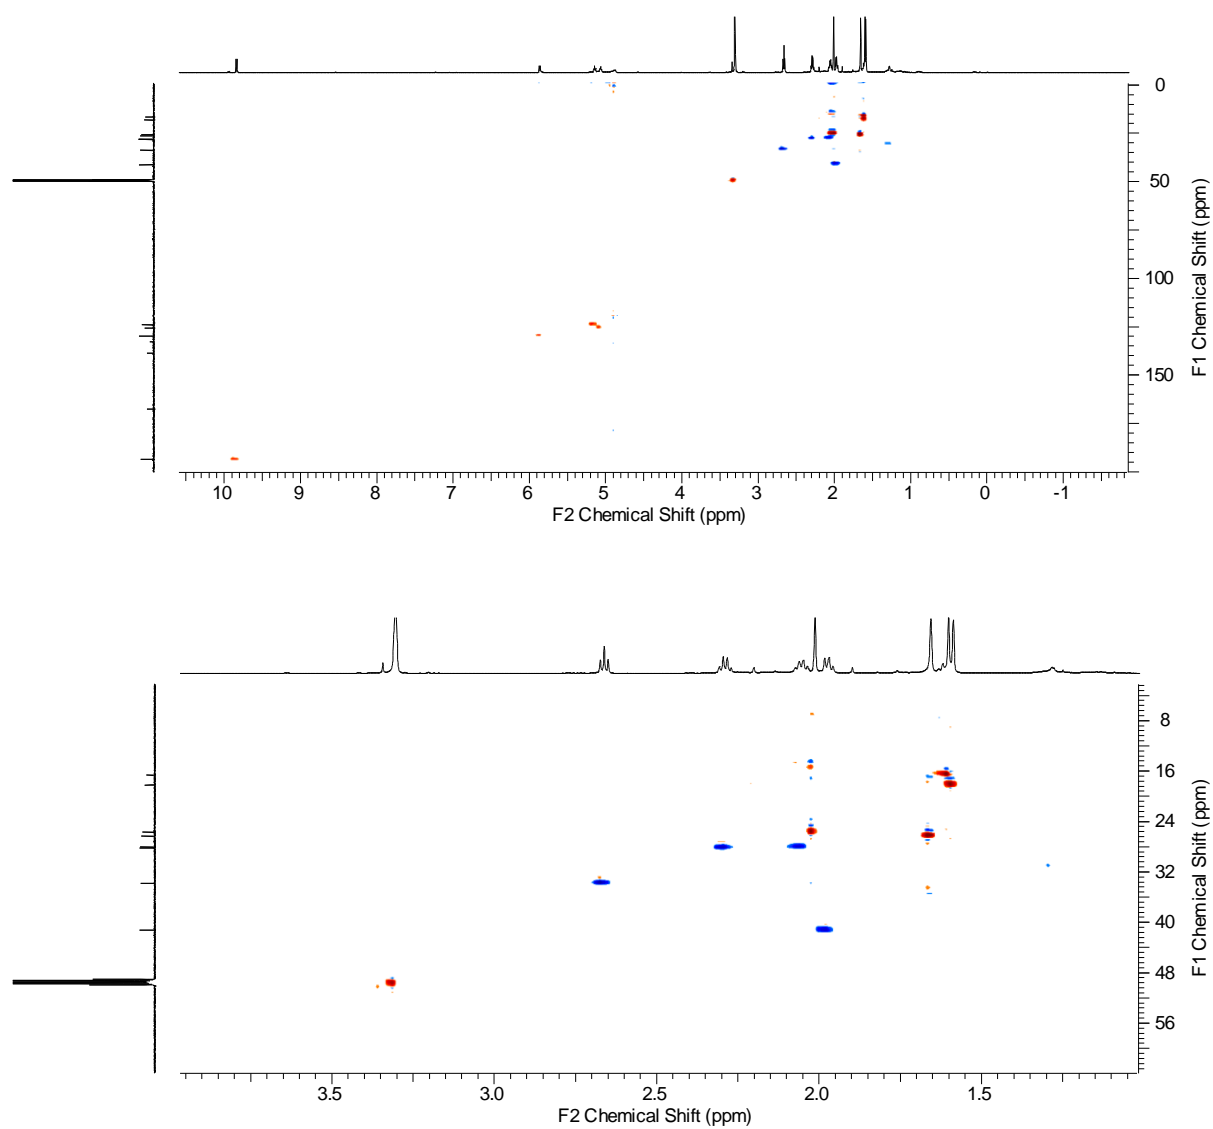

**Figure S12.** HMBC NMR spectrum of compound **2** in CD<sub>3</sub>OD

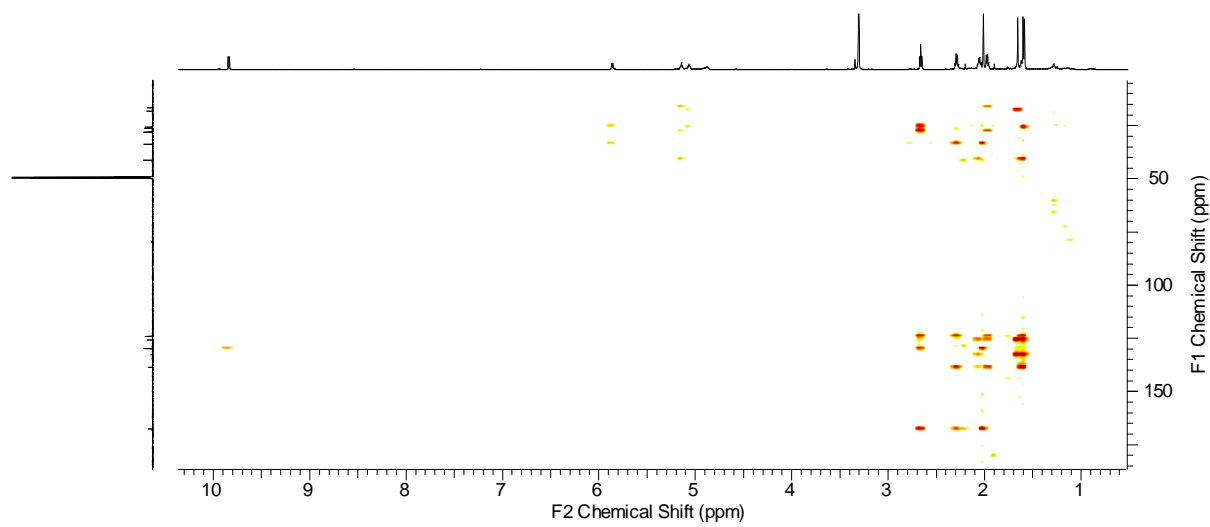

**Figure S13.**  $^1\text{H}$  NMR spectrum of compound **3** in  $\text{CDCl}_3$  (600 MHz)

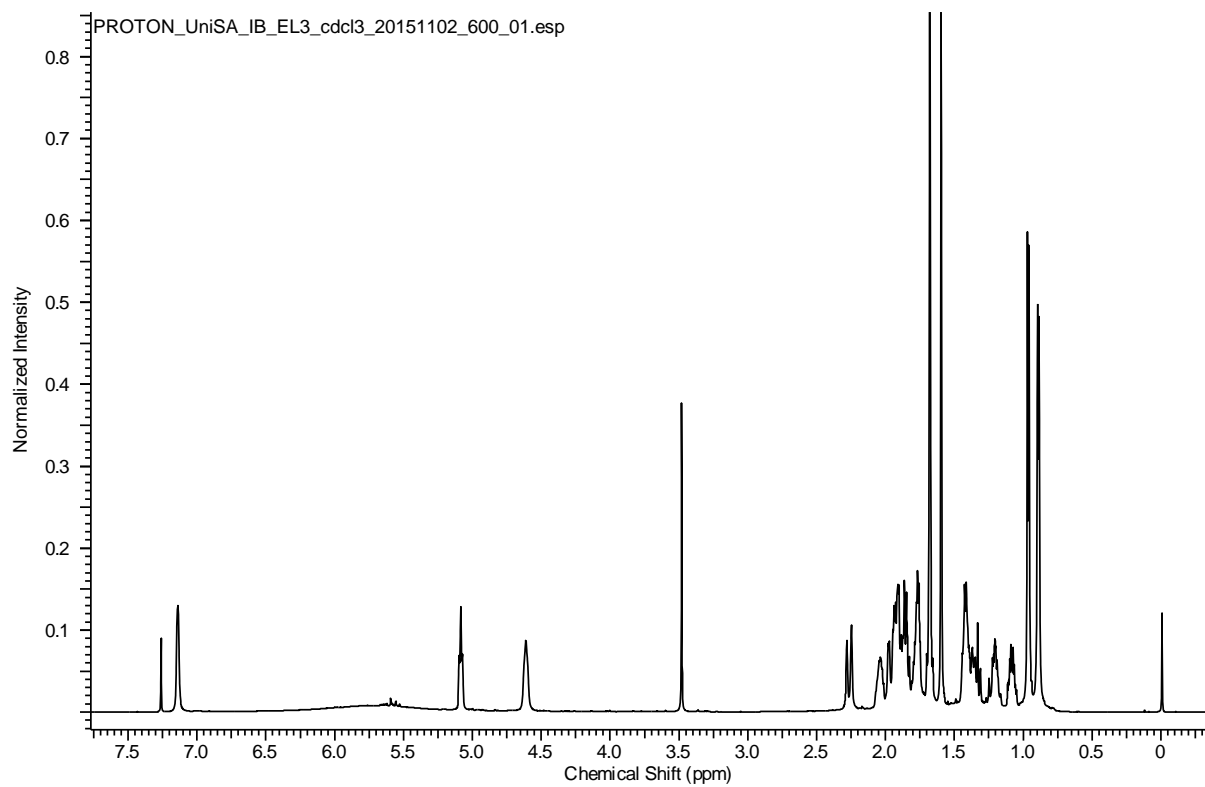

**Figure S14.**  $^{13}\text{C}$  NMR spectrum of compound **3** in  $\text{CDCl}_3$

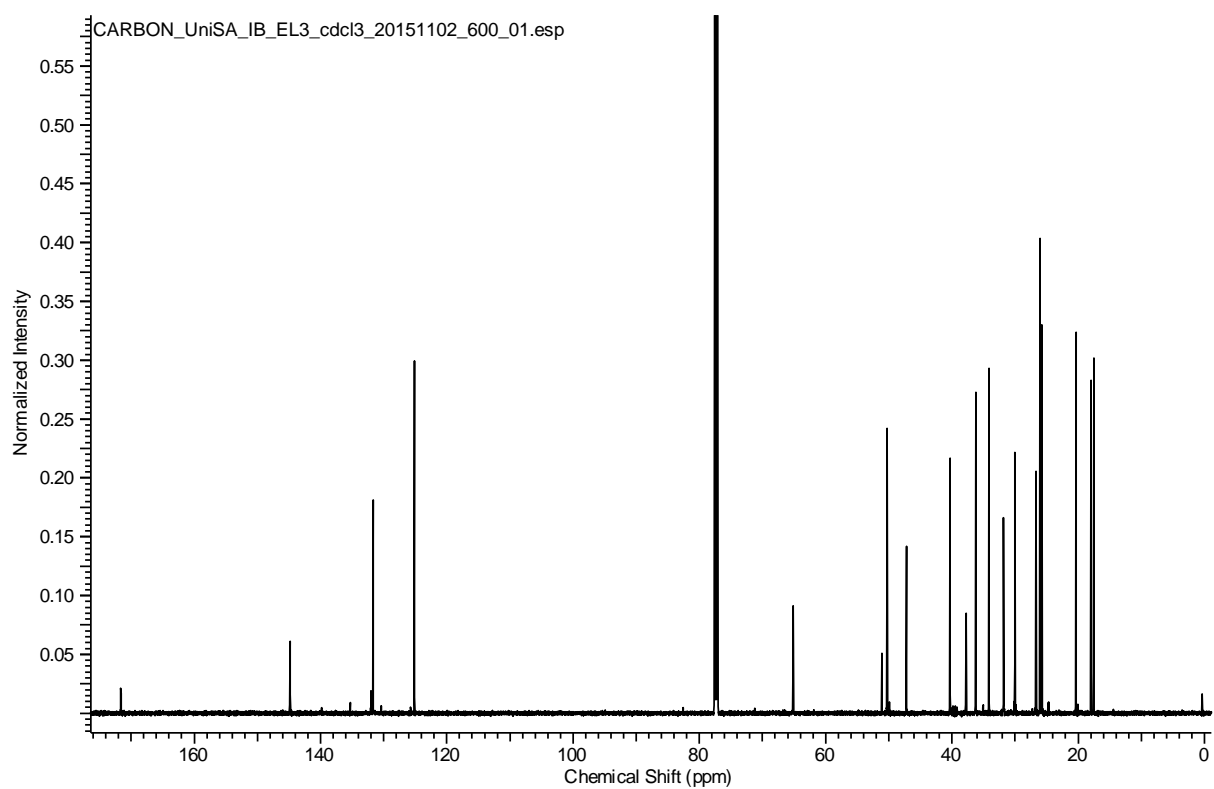

**Figure S15.**  $^1\text{H}$ - $^1\text{H}$  COSY NMR spectrum of compound **3** in  $\text{CDCl}_3$

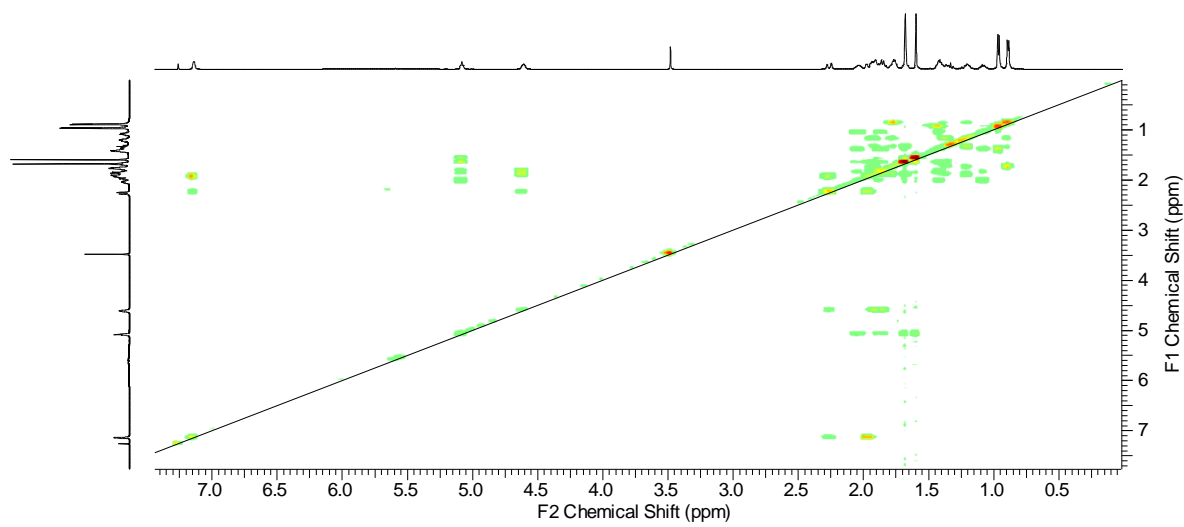



**Figure S16.** HSQC NMR spectrum of compound **3** in CDCl<sub>3</sub>

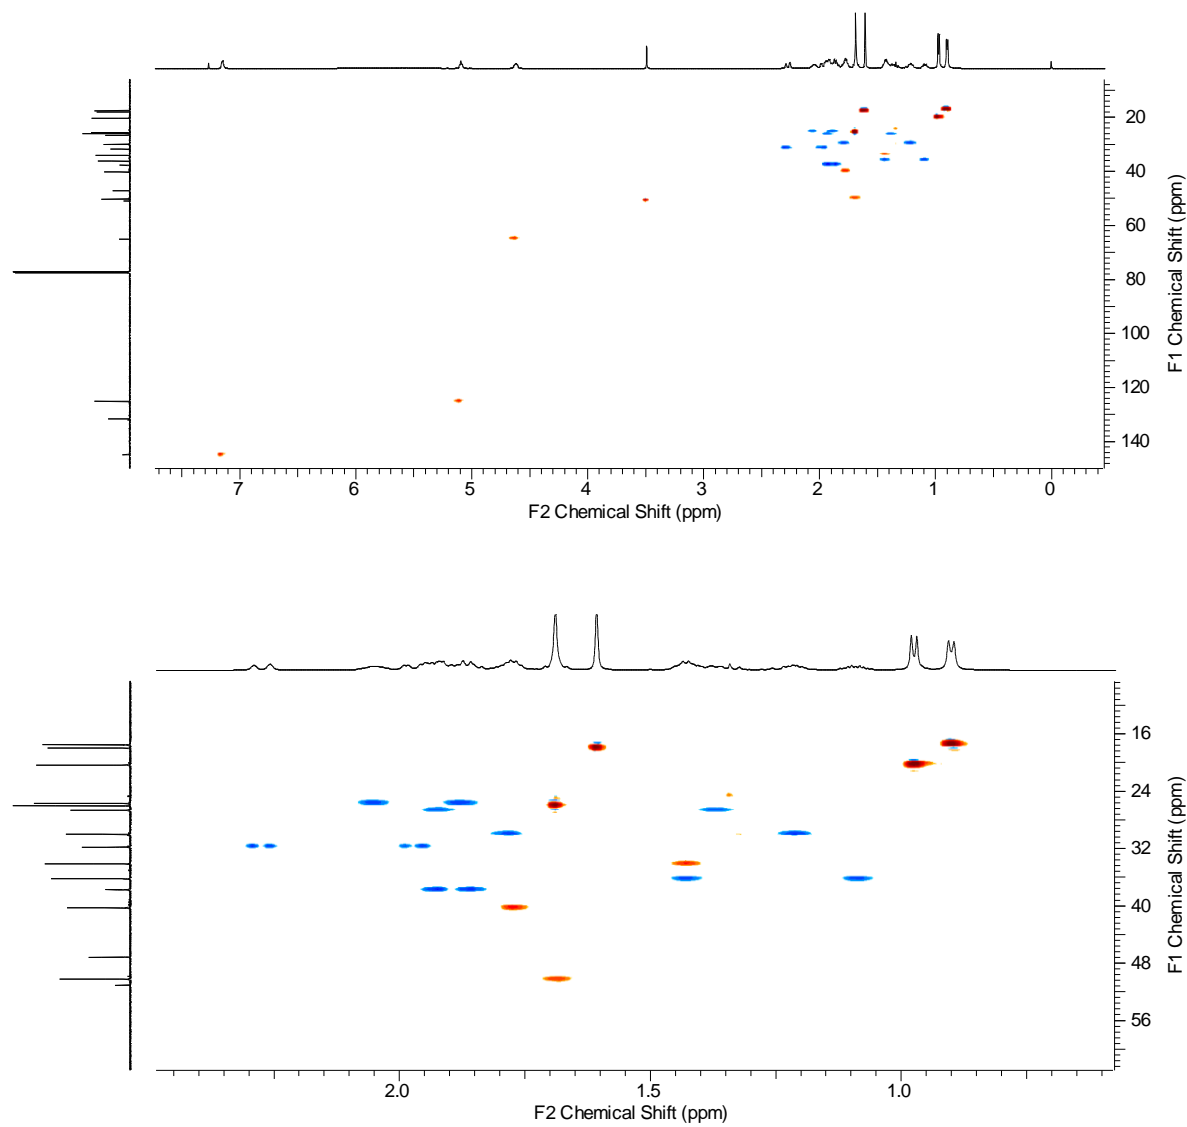

**Figure S17.** HMBC NMR spectrum of compound **3** in CDCl<sub>3</sub>

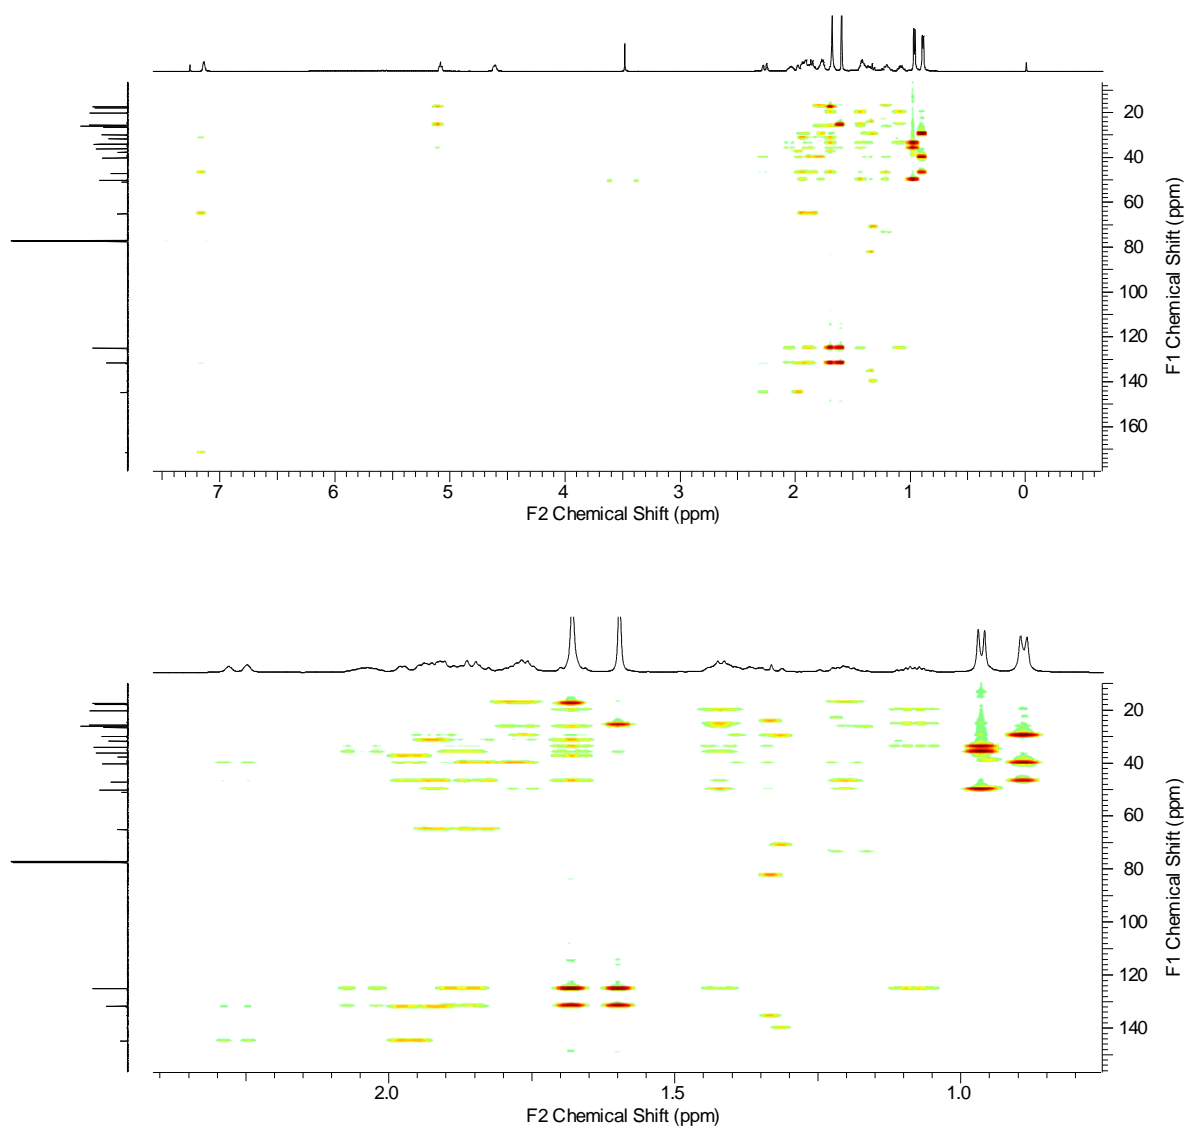

Supplement: antibiotics-08-00063-s001.pdf [file antibiotics-08-00063-s001.pdf]
